# Supplementary material for: Role of different coordinated Cu and reactive oxygen species on the highly active Cu–Ce–Zr mixed oxides in NH3-SCO: a combined in situ EPR and O2-TPD approach
Source: Royal Society of Chemistry journal article supplement (doi:10.1039/c5cy02125a), 2016-01-01

## Supplementary material

### **Role of different coordinated Cu and reactive oxygen species on the highly active Cu-Ce-Zr mixed oxides in NH<sub>3</sub>-SCO: A combined *in situ* EPR and O<sub>2</sub>-TPD approach**

Zhenping Qu<sup>a, +, \*</sup>, Zhong Wang<sup>a, b, +</sup>, Xiaoyu Zhang<sup>a</sup>, Hui Wang<sup>a</sup>

<sup>a</sup> Key Laboratory of Industrial Ecology and Environmental Engineering, School of Environmental Sciences and Technology, Dalian University of Technology, Dalian, 116024, China

<sup>b</sup> Key Laboratory of Biofuels, Qingdao Institute of Bioenergy and Bioprocess Technology, Chinese Academy of Sciences, Qingdao, 266101, China

---

<sup>+</sup> These authors contributed equally to this work

<sup>\*</sup> To whom correspondence should be addressed. E-mail: [quzhenping@dlut.edu.cn](mailto:quzhenping@dlut.edu.cn). Tel/Fax: 0086-411-84708083

## **Catalyst Preparation**

### **1. Citric Acid Sol-gel Method (SOL)**

The Cu-Ce-Zr mixed oxide was first prepared by citric acid sol-gel method (SOL). The cerium (III) nitrate ( $\text{Ce}(\text{NO}_3)_3 \cdot 6\text{H}_2\text{O}$ ), zirconium nitrate ( $\text{Zr}(\text{NO}_3)_4 \cdot 5\text{H}_2\text{O}$ ) and copper nitrate ( $\text{Cu}(\text{NO}_3)_2 \cdot 3\text{H}_2\text{O}$ ) were mixed in deionized water according to the desired molar ratio. Citric acid was added as the complexing agent with a 1.3:1 ratio of the acid to metal ions including  $\text{Ce}^{3+}$ ,  $\text{Zr}^{4+}$  and  $\text{Cu}^{2+}$ . Appropriate polyglycol with the weight of 50% citric acid was added. The blended solution was continuously stirred in a magnetic stirrer and heated at  $90^\circ\text{C}$  till transparent gel was formed. The resulting gel was dried at  $100^\circ\text{C}$  overnight, and the obtained sample was labeled as Cu-Ce-Zr (SOL).

### **2. Homogeneous Precipitation Method (HP)**

The Cu-Ce-Zr mixed oxide was then prepared by a homogeneous precipitation method using urea as precipitator (HP). The aqueous solutions of  $\text{Cu}(\text{NO}_3)_2 \cdot 3\text{H}_2\text{O}$ ,  $\text{Ce}(\text{NO}_3)_3 \cdot 6\text{H}_2\text{O}$  and  $\text{Zr}(\text{NO}_3)_4 \cdot 5\text{H}_2\text{O}$  were mixed. Excessive urea aqueous solution was then added into the mixed solution, with a urea/(Cu + Ce + Zr) molar ratio of 10:1. The mixed solution was then heated to  $90^\circ\text{C}$  and held there for 24 h with vigorous stirring. After filtration and washing with deionized water, the resulting precipitant was dried at  $100^\circ\text{C}$  overnight, and the obtained sample was labeled as Cu-Ce-Zr (HP).

### **3. Incipient wetness impregnation method (IW)**

First,  $\text{CeO}_2$ ,  $\text{ZrO}_2$  and Ce-Zr mixed oxide with Ce/Zr molar ratio of 4 were prepared by the surfactant-templated method[1]. Then, the catalyst was prepared by the incipient wetness impregnation method. The Ce-Zr mixed oxide support was added to  $\text{Cu}(\text{NO}_3)_2 \cdot 3\text{H}_2\text{O}$  aqueous

solution, and the obtained sample was denoted as Cu/Ce-Zr (IW); In addition, appropriate quantities of CeO<sub>2</sub> and ZrO<sub>2</sub> power were mixed in an agate mortar to prepare CeO<sub>2</sub>-ZrO<sub>2</sub> oxide by mechanical mixing. Subsequently, the CeO<sub>2</sub>-ZrO<sub>2</sub> support was added to the Cu(NO<sub>3</sub>)<sub>2</sub>•3H<sub>2</sub>O aqueous solution, and the obtained sample was denoted as Cu/CeO<sub>2</sub>-ZrO<sub>2</sub> (IW). Finally, all obtained slurries were stored at room temperature overnight and then dried at 100°C for 12 h.

## Figure Captions

**Fig. S1** The Madon-Boudart test of  $\text{NH}_3$  oxidation at  $180^\circ\text{C}$  over Cu-Ce-Zr (SOL) catalyst with different particle size

**Fig. S2** The Madon-Boudart test of  $\text{NH}_3$  oxidation at  $180^\circ\text{C}$  and  $200^\circ\text{C}$  over Cu-Ce-Zr (SOL) catalyst with the same particle size (20-40 mesh).

**Fig. S3** The TOF of  $\text{NH}_3$  oxidation in the presence of  $\text{H}_2\text{O}$ ,  $\text{SO}_2$  and  $\text{CO}_2$ .

**Fig. S4** Comparison of  $\text{H}_2$ -TPR patterns of a: fresh Cu-Ce-Zr (SOL), b: after treatment of  $\text{NH}_3$  at  $230^\circ\text{C}$  over fresh Cu-Ce-Zr (SOL) and c: after treatment of  $\text{O}_2$  at  $230^\circ\text{C}$  following by step b.

Figure S1

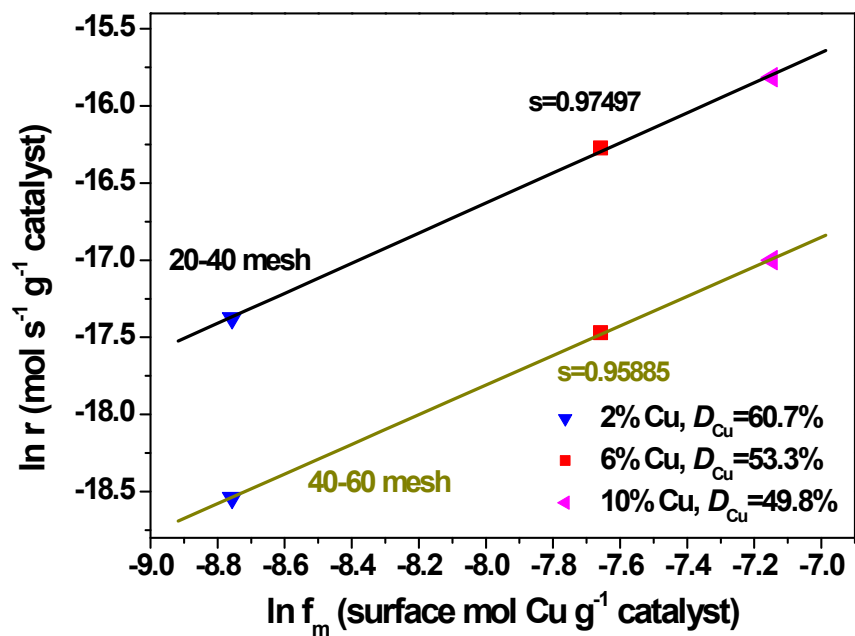

Figure S2

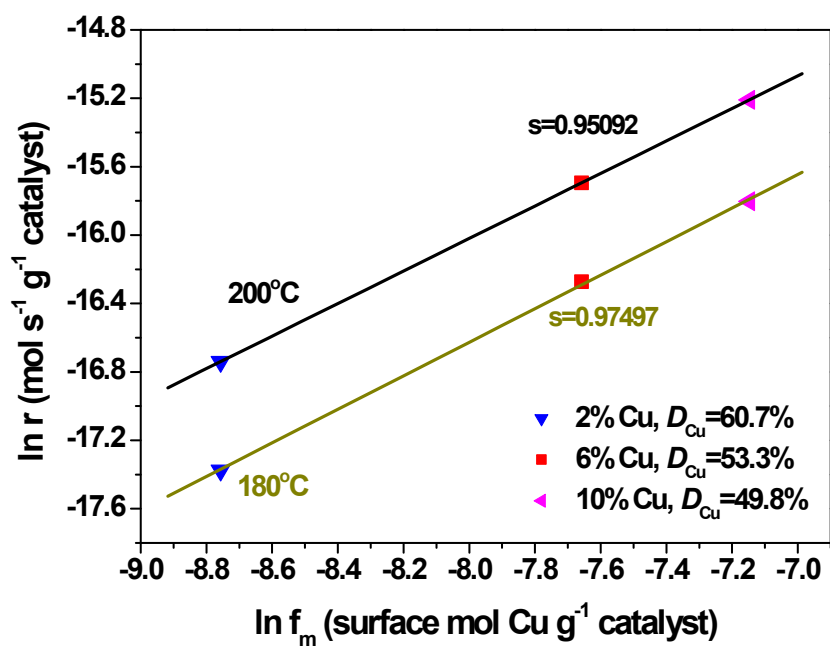

Figure S3

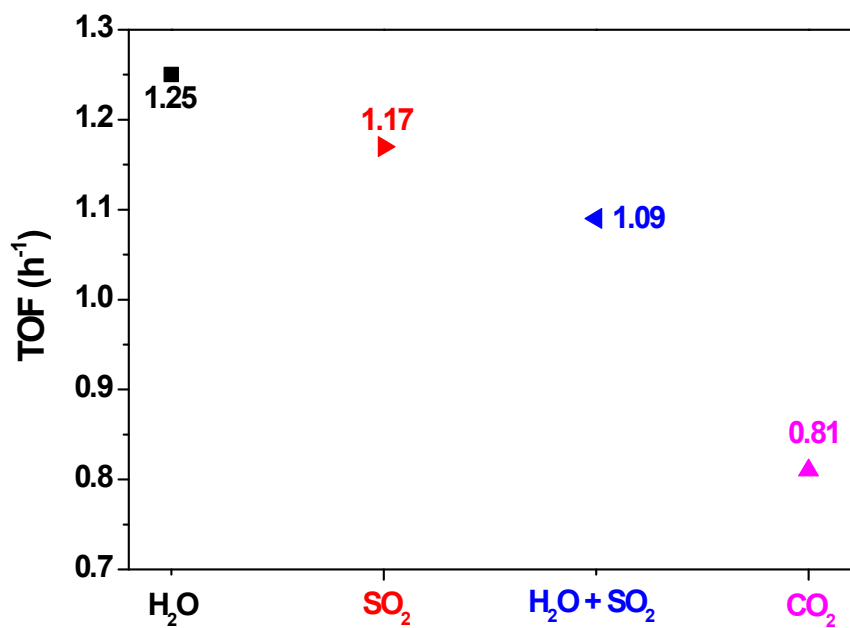

Figure S4

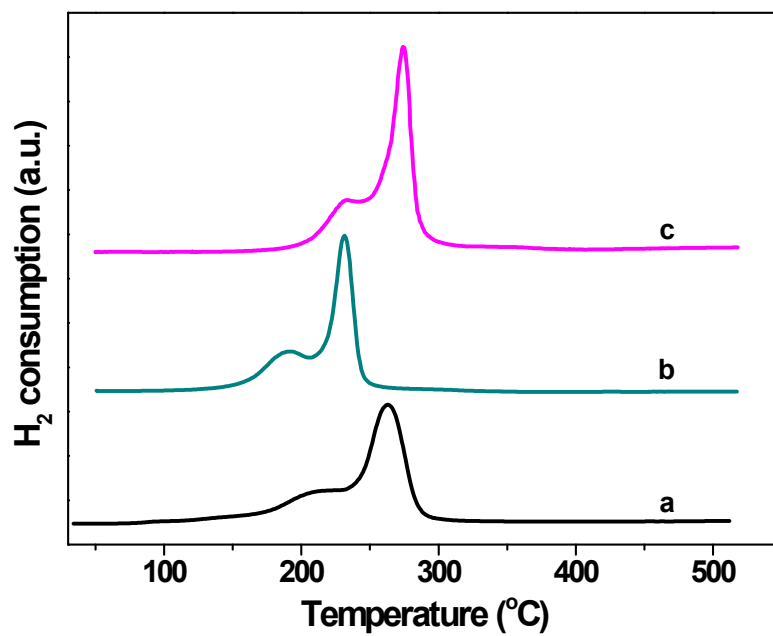

Supplement: c5cy02125a1.pdf [file c5cy02125a1.pdf]
